**Title:** ChatGPT-4 as a Board-Certified Surgeon: A Pilot Study

**Authors and Affiliations:** Joshua Roshal MD<sup>1,2</sup>, Caitlin Silvestri MD<sup>3</sup>, Tejas Sathe MD<sup>3,4</sup>, Courtney Townsend MD MAMSE FACS<sup>2</sup>, V. Suzanne Klimberg MD PhD MSHCT MAMSE FACS<sup>2</sup>, Alexander Perez MD MSHCT FACS<sup>2</sup>

<sup>1</sup>Brigham and Women's Hospital/Harvard Medical School, Boston, MA

<sup>2</sup>University of Texas Medical Branch, Galveston, TX

<sup>3</sup>New York Presbyterian/Columbia University Irving Medical Center, Department of Surgery, New York, NY

<sup>4</sup>University of California San Francisco, San Francisco, CA

**Corresponding Author Information:**

Joshua Roshal, MD

Mailing Address: 301 University Blvd, Galveston, TX 77551

Email: jaroshal@utmb.edu

**Withdrawal Statement:** The authors have withdrawn their manuscript to update the methodology. Therefore, the authors do not wish this work to be cited as a reference for the project. If you have any questions, please contact the corresponding author.
